# Supplementary material for: Sonoporation of the Round Window Membrane on a Sheep Model: A Safety Study
Source: MDPI journal article supplement (doi:10.3390/pharmaceutics15020442), 2023-01-29
Supplement: s1 [file s1]

# Supplementary Materials: Sonoporation of the Round Window Membrane on a Sheep Model: A Safety Study

Sandrine Kerneis, Jean-Michel Escoffre, John J. Galvin III, Ayache Bouakaz, Antoine Presset, Corentin Alix, Edward Oujagir, Antoine Lefèvre, Patrick Emond, Hélène Blasco and David Bakhos

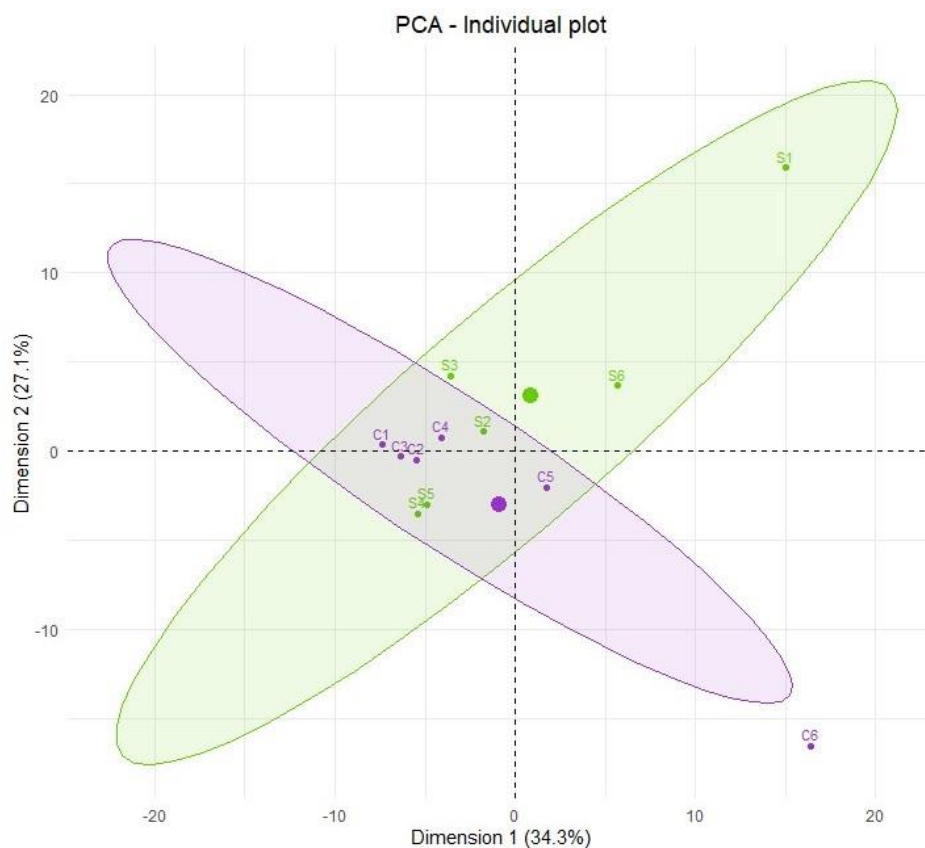

**Figure S1.** Unsupervised multivariate analysis of perilymph comparing sonoporation and control groups. Score-plot of the PCA constructed from the metabolites found according to components p1 and p2. The control samples are represented in purple (C1 to C6) and the sonoporation samples are in green (S1 to S6). Each group is associated with an ellipse regrouping all its samples. The thicker dots correspond to the center of each ellipse.

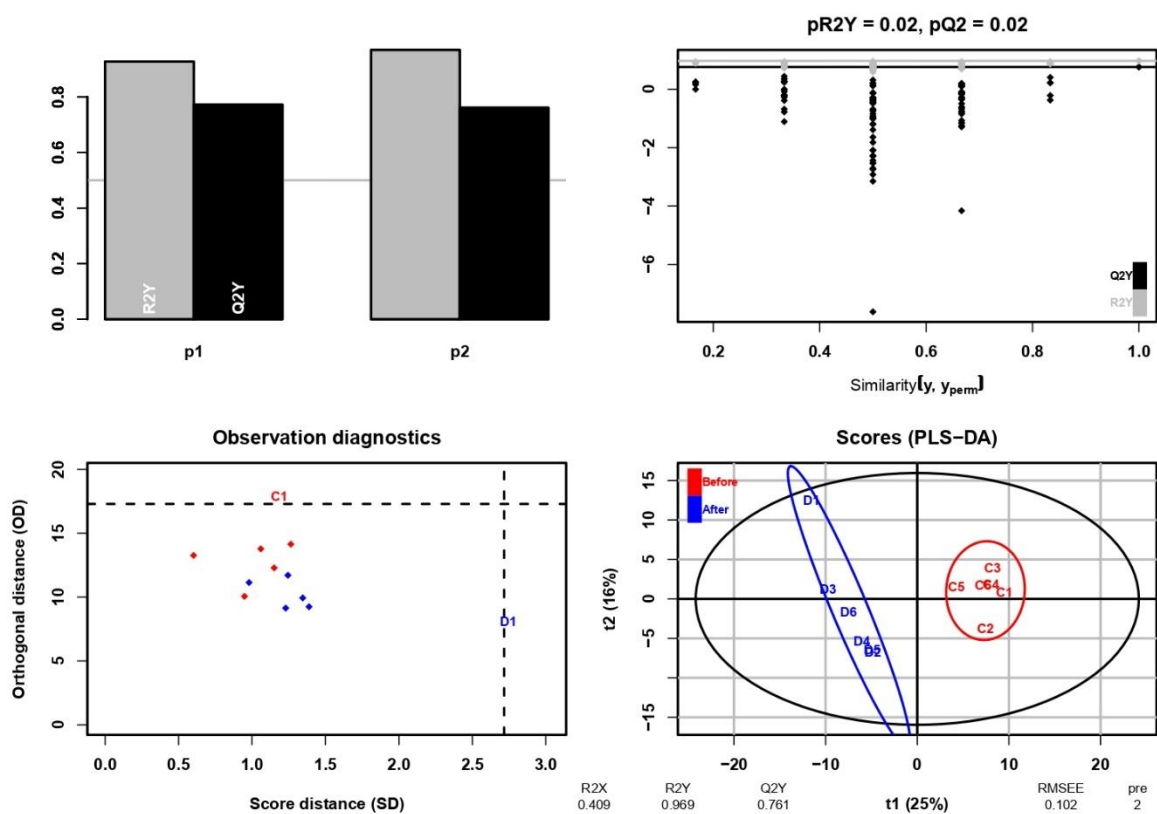

**Figure S2.** Supervised multivariate analysis of plasma comparing before and after sonoporation groups. PLS-DA constructed from the metabolites found according to components p1 and p2 with 100 permutations. The samples before sonoporation (Before) are represented in red (C1 to C6) and the samples after sonoporation (After) are represented in blue (D1 to D6). Each group is associated with an ellipse regrouping all its samples.

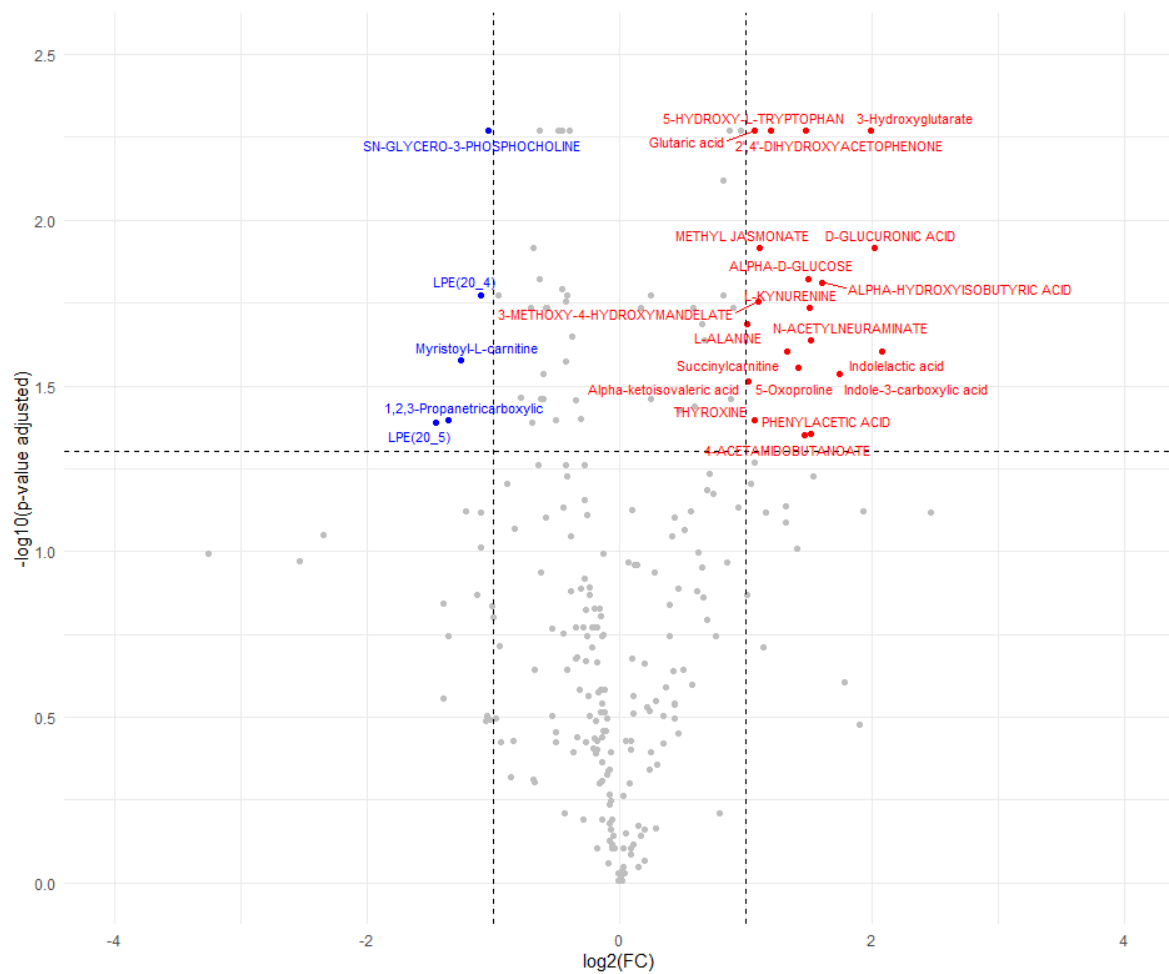

**Figure S3.** Volcano-plot comparing the dysregulation of metabolites before and after sonoporation, with thresholds set at  $\log_2\text{FC} < -1$  or  $> 1$  and adjusted  $p$ -value  $-\log_{10}(p\text{-value adjusted}) > 1.3$  ( $p < 0.05$ ). The blue symbols represent down-regulated metabolites, the red symbols represent up-regulated metabolites, and the gray symbols represent no significant dysregulation.

**Table S1.** List of metabolites found in the perilymph on sonoporation and control sides. For each metabolite, the mean relative concentration and standard deviation are presented for the sonoporation side and control side.

| Metabolites                         | Sonoporation ear |          | Control ear |          |
|-------------------------------------|------------------|----------|-------------|----------|
|                                     | Mean             | Std.     | Mean        | Std.     |
| 1,2,3-Propanetricarboxylic          | 0.009611         | 0.006626 | 0.011413    | 0.004348 |
| 12-Hydroxy-9-cis-octadecenoic acid  | 0.001434         | 0.001227 | 0.001270    | 0.000659 |
| 1-Aminocyclopropanecarboxylic acid  | 0.003072         | 0.001017 | 0.003343    | 0.000618 |
| 1-Methyladenosine                   | 0.000103         | 0.000102 | 0.000243    | 0.000384 |
| 2',4'-Dihydroxyacetophenone         | 0.000292         | 0.000055 | 0.000387    | 0.000168 |
| 24-Hydroxycholesterol               | 0.000881         | 0.000377 | 0.001163    | 0.000408 |
| 3-(3-Methoxy-4hydroxyphenyl)lactate | 0.000671         | 0.000311 | 0.000991    | 0.000379 |
| 3-hydroxyisobutyrate                | 0.007830         | 0.010110 | 0.005271    | 0.003982 |
| 3-Hydroxyoctanoic acid              | 0.001244         | 0.000166 | 0.001563    | 0.000697 |
| 3-Methyl-2-Oxovaleric acid          | 0.003150         | 0.002021 | 0.002732    | 0.000953 |
| 3-Methyladipic acid                 | 0.000614         | 0.000109 | 0.000776    | 0.000257 |
| 3-Ureidopropionate                  | 0.000054         | 0.000043 | 0.000075    | 0.000062 |
| 4-Guanidinobutanoate                | 0.000250         | 0.000176 | 0.000427    | 0.000388 |
| 4-Hydroxy-3-Methoxyphenylglycol     | 0.000904         | 0.000427 | 0.001250    | 0.000518 |

|                               |          |          |          |          |
|-------------------------------|----------|----------|----------|----------|
| 4-Hydroxy-L-Proline           | 0.001672 | 0.000191 | 0.001644 | 0.000380 |
| 4-Hydroxyphenyllactic Acid    | 0.000500 | 0.000400 | 0.000466 | 0.000169 |
| 4-Imidazoleacetic Acid        | 0.000213 | 0.000028 | 0.000211 | 0.000074 |
| 4-Methyl-2-Oxo-Pentanoic Acid | 0.004315 | 0.002002 | 0.003665 | 0.001758 |
| 5-Methylcytosine              | 0.000480 | 0.000169 | 0.000684 | 0.000358 |
| 5-Oxoproline                  | 0.012005 | 0.006194 | 0.011415 | 0.004887 |
| 7-Dehydrocholesterol          | 0.004184 | 0.002026 | 0.005900 | 0.002484 |
| 7-Ketodeoxycholic Acid        | 0.000125 | 0.000133 | 0.000070 | 0.000066 |
| Adenosine                     | 0.017501 | 0.028559 | 0.013550 | 0.011296 |
| Allantoin                     | 0.002745 | 0.002532 | 0.002379 | 0.000911 |
| Alpha-Aminoadipate            | 0.000379 | 0.000436 | 0.000162 | 0.000069 |
| Alpha-Aminobutyric Acid       | 0.000897 | 0.000700 | 0.000583 | 0.000352 |
| Alpha-D-Glucose               | 0.194806 | 0.046757 | 0.204547 | 0.021442 |
| Alpha-Hydroxyisobutyric Acid  | 0.006443 | 0.003729 | 0.005105 | 0.002349 |
| Alpha-Ketoglutaric Acid       | 0.002477 | 0.004063 | 0.001466 | 0.002002 |
| Azelaic Acid                  | 0.014189 | 0.002090 | 0.018746 | 0.009367 |
| Betaine                       | 0.335625 | 0.095357 | 0.303323 | 0.055632 |
| Bilirubin                     | 0.000072 | 0.000077 | 0.000060 | 0.000079 |
| Butanoylcarnitine             | 0.002620 | 0.002053 | 0.000589 | 0.000278 |
| Cadaverine                    | 0.000178 | 0.000078 | 0.000395 | 0.000193 |
| Cholic Acid                   | 0.000561 | 0.000615 | 0.000406 | 0.000392 |
| Cinnamoylglycine-Trans        | 0.000407 | 0.000708 | 0.000238 | 0.000133 |
| Citraconic Acid               | 0.001125 | 0.000382 | 0.001110 | 0.000449 |
| Citramalate                   | 0.003240 | 0.002419 | 0.002704 | 0.001507 |
| Citrate                       | 0.020535 | 0.010389 | 0.013660 | 0.005207 |
| Citrulline                    | 0.002543 | 0.002048 | 0.001808 | 0.000632 |
| Creatine                      | 0.147254 | 0.084118 | 0.131674 | 0.035294 |
| Creatinine                    | 0.271930 | 0.111264 | 0.355657 | 0.069099 |
| Cytidine                      | 0.001866 | 0.001764 | 0.001601 | 0.000697 |
| Cytidine 5'-Diphosphate       | 0.000029 | 0.000014 | 0.000040 | 0.000020 |
| Cytosine                      | 0.003658 | 0.001599 | 0.002934 | 0.000481 |
| Deoxycarnitine                | 0.001409 | 0.000735 | 0.000799 | 0.000328 |
| Deoxycholic Acid              | 0.000282 | 0.000210 | 0.000192 | 0.000144 |
| Deoxycytidine                 | 0.000112 | 0.000045 | 0.000135 | 0.000069 |
| Deoxyuridine                  | 0.000184 | 0.000093 | 0.000193 | 0.000157 |
| D-Glucosamine                 | 0.006560 | 0.003101 | 0.007623 | 0.001068 |
| D-Glucose 6-Phosphate         | 0.002325 | 0.003443 | 0.000756 | 0.000879 |
| D-Glucuronic Acid             | 0.001503 | 0.001338 | 0.000981 | 0.000429 |
| D-Lactose                     | 0.001104 | 0.000906 | 0.001634 | 0.002701 |
| Dodec-2-Enedioic Acid         | 0.000533 | 0.000145 | 0.000724 | 0.000341 |
| D-Pantothenic Acid            | 0.000313 | 0.000188 | 0.000335 | 0.000131 |
| D-Xylose                      | 0.005288 | 0.001165 | 0.005466 | 0.000630 |
| Epinephrine                   | 0.011544 | 0.003696 | 0.011584 | 0.004620 |
| Ethanolamine                  | 0.000259 | 0.000154 | 0.000469 | 0.000241 |

|                                           |          |          |          |          |
|-------------------------------------------|----------|----------|----------|----------|
| Ethanolamine Phosphate                    | 0.000236 | 0.000105 | 0.000261 | 0.000124 |
| Fumaric Acid                              | 0.000566 | 0.000856 | 0.000450 | 0.000675 |
| Gluconic Acid                             | 0.006915 | 0.005314 | 0.004640 | 0.001018 |
| Glyceraldehyde 3-Phosphate Diethyl Acetal | 0.000614 | 0.000344 | 0.000848 | 0.000300 |
| Glycerate                                 | 0.002799 | 0.000704 | 0.002857 | 0.001082 |
| Glycerol 2-Phosphate                      | 0.004955 | 0.004894 | 0.003041 | 0.001202 |
| Glycine                                   | 0.004727 | 0.000984 | 0.004762 | 0.001215 |
| Glycocholic Acid                          | 0.000347 | 0.000615 | 0.000157 | 0.000216 |
| Glycodeoxycholic Acid                     | 0.000187 | 0.000341 | 0.000049 | 0.000040 |
| Glycolaldehyde Dimer                      | 0.003106 | 0.000762 | 0.003207 | 0.000370 |
| Glycolate                                 | 0.001601 | 0.000296 | 0.001717 | 0.000341 |
| Guanine                                   | 0.005683 | 0.002300 | 0.004958 | 0.001501 |
| Guanosine                                 | 0.000550 | 0.000303 | 0.000513 | 0.000270 |
| Hexadecanoylcarnitine                     | 0.001296 | 0.002585 | 0.000137 | 0.000084 |
| Hexanoylcarnitine                         | 0.000350 | 0.000382 | 0.000036 | 0.000017 |
| Hippuric Acid                             | 0.008340 | 0.010618 | 0.006179 | 0.003369 |
| Histamine                                 | 0.000193 | 0.000112 | 0.000475 | 0.000263 |
| Hydroxybutyrylcarnitine                   | 0.002476 | 0.002301 | 0.000357 | 0.000238 |
| Hypoxanthine                              | 0.106630 | 0.033771 | 0.127808 | 0.049083 |
| Indoxyl Sulfate                           | 0.000448 | 0.000539 | 0.000246 | 0.000131 |
| Inosine                                   | 0.004130 | 0.001644 | 0.004973 | 0.001975 |
| Isocitric Acid                            | 0.001431 | 0.000510 | 0.001608 | 0.000713 |
| Lactate                                   | 0.497440 | 0.128904 | 0.531821 | 0.015342 |
| L-Alanine                                 | 0.002338 | 0.002821 | 0.001295 | 0.000529 |
| L-Anserine                                | 0.000329 | 0.000324 | 0.000269 | 0.000115 |
| L-Arginine                                | 0.016953 | 0.011294 | 0.025355 | 0.007870 |
| L-Asparagine                              | 0.000476 | 0.000344 | 0.000280 | 0.000096 |
| L-Aspartate                               | 0.001120 | 0.000408 | 0.001621 | 0.002163 |
| L-Carnitine                               | 0.099809 | 0.061666 | 0.042855 | 0.016631 |
| Leucine                                   | 0.000213 | 0.000181 | 0.000136 | 0.000050 |
| L-Glutamic Acid                           | 0.008455 | 0.006321 | 0.005808 | 0.003746 |
| L-Glutamine                               | 0.044834 | 0.006259 | 0.047316 | 0.012666 |
| L-Histidine                               | 0.004355 | 0.001779 | 0.004820 | 0.000802 |
| L-Kynurenine                              | 0.000656 | 0.000282 | 0.000730 | 0.000489 |
| L-Lysine                                  | 0.003390 | 0.000779 | 0.003586 | 0.000464 |
| L-Methionine                              | 0.003040 | 0.000615 | 0.002992 | 0.000553 |
| L-Ornithine                               | 0.002856 | 0.002306 | 0.002044 | 0.000803 |
| LPC(14_0)                                 | 0.000026 | 0.000022 | 0.000017 | 0.000019 |
| LPC(16_0)                                 | 0.001771 | 0.001624 | 0.001518 | 0.001785 |
| LPC(16_1)                                 | 0.000084 | 0.000075 | 0.000043 | 0.000056 |
| LPC(18_0)                                 | 0.001446 | 0.001280 | 0.001229 | 0.001231 |
| LPC(18_1)                                 | 0.001316 | 0.001119 | 0.000824 | 0.000897 |
| LPC(18_2)                                 | 0.000467 | 0.000507 | 0.000269 | 0.000320 |
| LPC(18_3)                                 | 0.000163 | 0.000176 | 0.000062 | 0.000085 |

|                              |          |          |          |          |
|------------------------------|----------|----------|----------|----------|
| LPC(20_4)                    | 0.000161 | 0.000214 | 0.000127 | 0.000126 |
| LPC(22_6)                    | 0.000150 | 0.000184 | 0.000079 | 0.000103 |
| L-Phenylalanine              | 0.001307 | 0.000744 | 0.001130 | 0.000357 |
| L-Proline                    | 0.022170 | 0.008178 | 0.017150 | 0.005232 |
| L-Serine                     | 0.002335 | 0.000675 | 0.002549 | 0.000694 |
| L-Threonine                  | 0.002316 | 0.000932 | 0.001975 | 0.000699 |
| L-Tryptophan                 | 0.001919 | 0.001546 | 0.001589 | 0.000760 |
| L-Tyrosine                   | 0.001450 | 0.000644 | 0.001204 | 0.000364 |
| L-Valine                     | 0.183791 | 0.036140 | 0.143511 | 0.031487 |
| Malic Acid                   | 0.002779 | 0.004733 | 0.001937 | 0.002818 |
| Mannitol                     | 0.009612 | 0.004220 | 0.012214 | 0.007072 |
| Mesoxalate                   | 0.000083 | 0.000053 | 0.000086 | 0.000035 |
| Methyl Jasmonate             | 0.001600 | 0.000239 | 0.002019 | 0.000843 |
| Myristoyl-L-Carnitine        | 0.000329 | 0.000655 | 0.000025 | 0.000020 |
| N(Pai)-Methyl-L-Histidine    | 0.006046 | 0.001469 | 0.005756 | 0.000827 |
| N6,N6,N6-Trimethyl-L-Lysine  | 0.012375 | 0.013274 | 0.012702 | 0.005437 |
| N-Acetylglycine              | 0.001389 | 0.002289 | 0.000832 | 0.000646 |
| N-Acetyl-L-Alanine           | 0.000366 | 0.000128 | 0.000444 | 0.000152 |
| N-Acetyl-L-Aspartic Acid     | 0.000903 | 0.000375 | 0.006131 | 0.010005 |
| N-Acetylneuraminate          | 0.000782 | 0.000383 | 0.001048 | 0.000347 |
| N-Acetylputrescine           | 0.000154 | 0.000103 | 0.000311 | 0.000205 |
| Nicotinamide                 | 0.037819 | 0.016187 | 0.053950 | 0.011323 |
| Nicotinate                   | 0.001337 | 0.000802 | 0.002185 | 0.000450 |
| Octadecanoylcarnitine        | 0.000921 | 0.001621 | 0.000207 | 0.000140 |
| Octanoyl-L-Carnitine         | 0.000130 | 0.000191 | 0.000019 | 0.000005 |
| Oleoylcarnitine              | 0.001413 | 0.002628 | 0.000306 | 0.000476 |
| Omega-Hydroxydodecanoic Acid | 0.000425 | 0.000164 | 0.000428 | 0.000199 |
| Ophthalmic Acid              | 0.001351 | 0.002527 | 0.001006 | 0.000987 |
| PC(30_0)                     | 0.000028 | 0.000013 | 0.000035 | 0.000027 |
| PC(31_0)                     | 0.000038 | 0.000014 | 0.000039 | 0.000026 |
| PC(32_0)                     | 0.000110 | 0.000042 | 0.000173 | 0.000151 |
| PC(32_1)                     | 0.000110 | 0.000034 | 0.000136 | 0.000098 |
| PC(32_2)                     | 0.000014 | 0.000008 | 0.000026 | 0.000036 |
| PC(33_0)                     | 0.000038 | 0.000012 | 0.000044 | 0.000033 |
| PC(33_1)                     | 0.000120 | 0.000046 | 0.000117 | 0.000092 |
| PC(33_2)                     | 0.000059 | 0.000023 | 0.000051 | 0.000041 |
| PC(34_1)                     | 0.001545 | 0.000537 | 0.002143 | 0.002212 |
| PC(34_2)                     | 0.001458 | 0.000589 | 0.001463 | 0.001435 |
| PC(34_3)                     | 0.000545 | 0.000377 | 0.000431 | 0.000447 |
| PC(35_1)                     | 0.000161 | 0.000048 | 0.000186 | 0.000153 |
| PC(35_2)                     | 0.000194 | 0.000058 | 0.000199 | 0.000175 |
| PC(35_3)                     | 0.000088 | 0.000049 | 0.000075 | 0.000077 |
| PC(36_1)                     | 0.000713 | 0.000190 | 0.000987 | 0.000916 |
| PC(36_2)                     | 0.001261 | 0.000342 | 0.001519 | 0.001286 |

|                             |          |          |          |          |
|-----------------------------|----------|----------|----------|----------|
| PC(36_3)                    | 0.000842 | 0.000322 | 0.000938 | 0.000863 |
| PC(36_4)                    | 0.000423 | 0.000167 | 0.000489 | 0.000436 |
| PC(36_5)                    | 0.000281 | 0.000209 | 0.000271 | 0.000320 |
| PC(36_6)                    | 0.000028 | 0.000031 | 0.000017 | 0.000023 |
| PC(37_4)                    | 0.000065 | 0.000020 | 0.000069 | 0.000067 |
| PC(37_5)                    | 0.000057 | 0.000027 | 0.000059 | 0.000064 |
| PC(38_2)                    | 0.000038 | 0.000011 | 0.000047 | 0.000046 |
| PC(38_3)                    | 0.000145 | 0.000050 | 0.000144 | 0.000122 |
| PC(38_5)                    | 0.001008 | 0.000536 | 0.001116 | 0.001157 |
| PC(38_6)                    | 0.000465 | 0.000194 | 0.000574 | 0.000660 |
| PC(38_7)                    | 0.000041 | 0.000033 | 0.000032 | 0.000038 |
| PC(39_5)                    | 0.000060 | 0.000022 | 0.000065 | 0.000065 |
| PC(39_6)                    | 0.000051 | 0.000014 | 0.000060 | 0.000057 |
| PC(40_4)                    | 0.000045 | 0.000021 | 0.000057 | 0.000063 |
| PC(40_5)                    | 0.000315 | 0.000144 | 0.000384 | 0.000384 |
| PC(40_6)                    | 0.000370 | 0.000082 | 0.000524 | 0.000581 |
| PC(40_7)                    | 0.000082 | 0.000023 | 0.000104 | 0.000113 |
| PC(40_8)                    | 0.000054 | 0.000049 | 0.000044 | 0.000058 |
| PC(40_9)                    | 0.000022 | 0.000022 | 0.000019 | 0.000028 |
| PE(18_1__18_1)              | 0.000013 | 0.000010 | 0.000044 | 0.000057 |
| Phosphocholine              | 0.001697 | 0.000758 | 0.002737 | 0.002648 |
| Propanoylcarnitine          | 0.004531 | 0.003786 | 0.001140 | 0.000417 |
| Pyridoxamine                | 0.000757 | 0.000221 | 0.000802 | 0.000163 |
| Quinoline                   | 0.001027 | 0.000386 | 0.001127 | 0.000334 |
| Riboflavin                  | 0.000009 | 0.000006 | 0.000006 | 0.000002 |
| Sarcosine                   | 0.001521 | 0.000647 | 0.001444 | 0.000378 |
| Sitosterol                  | 0.001076 | 0.000488 | 0.001466 | 0.000472 |
| SM(32_1)                    | 0.000021 | 0.000005 | 0.000025 | 0.000024 |
| SM(33_1)                    | 0.000076 | 0.000017 | 0.000096 | 0.000089 |
| SM(34_1)                    | 0.000695 | 0.000115 | 0.001014 | 0.000835 |
| SM(34_2)                    | 0.000074 | 0.000025 | 0.000097 | 0.000098 |
| SM(35_1)                    | 0.000074 | 0.000012 | 0.000107 | 0.000090 |
| SM(36_1)                    | 0.000074 | 0.000035 | 0.000115 | 0.000053 |
| SM(36_2)                    | 0.000032 | 0.000004 | 0.000047 | 0.000037 |
| SM(40_2)                    | 0.000008 | 0.000002 | 0.000015 | 0.000014 |
| SM(41_2)                    | 0.000020 | 0.000007 | 0.000042 | 0.000040 |
| SM(42_2)                    | 0.000097 | 0.000063 | 0.000290 | 0.000286 |
| SM(42_3)                    | 0.000020 | 0.000013 | 0.000052 | 0.000050 |
| Sn-Glycero-3-Phosphocholine | 0.000808 | 0.000429 | 0.001168 | 0.001044 |
| Suberic Acid                | 0.004365 | 0.000606 | 0.006085 | 0.003124 |
| Succinic Acid               | 0.005313 | 0.007442 | 0.009207 | 0.018522 |
| Taurine                     | 0.049184 | 0.060318 | 0.016710 | 0.010733 |
| Taurochenodesoxycholic Acid | 0.000249 | 0.000234 | 0.000089 | 0.000069 |
| Taurocholic Acid            | 0.000588 | 0.000622 | 0.000455 | 0.000867 |

|                           |          |          |          |          |
|---------------------------|----------|----------|----------|----------|
| Tetradecenoyl-L-Carnitine | 0.000156 | 0.000287 | 0.000021 | 0.000016 |
| Thymidine                 | 0.000412 | 0.000205 | 0.000260 | 0.000220 |
| Trans-Cinnamate           | 0.011609 | 0.005342 | 0.016196 | 0.005898 |
| Uracil                    | 0.000985 | 0.000257 | 0.001257 | 0.000386 |
| Uridine                   | 0.002860 | 0.001863 | 0.002339 | 0.000846 |
| Urocanic Acid             | 0.000475 | 0.000179 | 0.000534 | 0.000255 |
| Valeryl-L-Carnitine       | 0.000910 | 0.000583 | 0.000395 | 0.000050 |
| Xanthine                  | 0.000721 | 0.000872 | 0.000718 | 0.000625 |



**Table S2.** List of down- and up-regulated metabolites in plasma after sonoporation with mean concentration and standard deviation before and after sonoporation, as well as p-values from Student's t-test and after FDR adjustment and Fold-Change.

| Metabolite                   | Before sonoporation |          | After sonoporation |          | p-value  | adj<br>p-value | Fold-<br>Change | Expression |
|------------------------------|---------------------|----------|--------------------|----------|----------|----------------|-----------------|------------|
|                              | Mean                | Std.     | Mean               | Std.     |          |                |                 |            |
| 1,2,3-Propanetricarboxylic   | 0.004488            | 0.002029 | 0.001753           | 0.000670 | 0.008721 | 0.040147       | 0.390705        | Down       |
| 2',4'-Dihydroxyacetophenone  | 0.000055            | 0.000022 | 0.000152           | 0.000026 | 0.000210 | 0.005384       | 2.787366        | Up         |
| 3-Hydroxyglutarate           | 0.000926            | 0.000197 | 0.003684           | 0.000623 | 0.000214 | 0.005384       | 3.980310        | Up         |
| 3-Methoxy-4-Hydroxymandelate | 0.000059            | 0.000013 | 0.000126           | 0.000026 | 0.001653 | 0.017577       | 2.139103        | Up         |
| 4-Acetamidobutanoate         | 0.000203            | 0.000054 | 0.000563           | 0.000250 | 0.010355 | 0.044594       | 2.772105        | Up         |
| 5-Hydroxy-L-Tryptophan       | 0.000098            | 0.000054 | 0.000225           | 0.000060 | 0.000060 | 0.005384       | 2.299254        | Up         |
| 5-Oxoproline                 | 0.021581            | 0.010416 | 0.057686           | 0.026034 | 0.004498 | 0.027929       | 2.672940        | Up         |
| Alpha-D-Glucose              | 0.004168            | 0.000967 | 0.011795           | 0.002820 | 0.000923 | 0.015007       | 2.830014        | Up         |
| Alpha-Hydroxyisobutyric Acid | 0.010324            | 0.005559 | 0.031441           | 0.012177 | 0.001040 | 0.015434       | 3.045515        | Up         |
| Alpha-Ketoisovaleric Acid    | 0.003306            | 0.001685 | 0.006699           | 0.001484 | 0.005277 | 0.030627       | 2.026284        | Up         |
| D-Glucuronic Acid            | 0.000521            | 0.000371 | 0.002115           | 0.000300 | 0.000610 | 0.012178       | 4.056619        | Up         |
| Glutaric Acid                | 0.000295            | 0.000155 | 0.000619           | 0.000119 | 0.000082 | 0.005384       | 2.095788        | Up         |
| Indole-3-Carboxylic Acid     | 0.000016            | 0.000004 | 0.000052           | 0.000016 | 0.004924 | 0.029216       | 3.358259        | Up         |
| Indolelactic Acid            | 0.000407            | 0.000126 | 0.001718           | 0.000526 | 0.003641 | 0.024924       | 4.219984        | Up         |
| L-Alanine                    | 0.000513            | 0.000110 | 0.001031           | 0.000281 | 0.002693 | 0.020544       | 2.008565        | Up         |
| L-Kynurenine                 | 0.000226            | 0.000136 | 0.000643           | 0.000278 | 0.002273 | 0.018388       | 2.842316        | Up         |
| LPE(20_4)                    | 0.000002            | 0.000000 | 0.000001           | 0.000000 | 0.001509 | 0.016790       | 0.467395        | Down       |
| LPE(20_5)                    | 0.000006            | 0.000002 | 0.000002           | 0.000001 | 0.009151 | 0.040720       | 0.364567        | Down       |
| Methyl Jasmonate             | 0.000370            | 0.000044 | 0.000801           | 0.000124 | 0.000670 | 0.012178       | 2.162471        | Up         |
| Myristoyl-L-Carnitine        | 0.000100            | 0.000053 | 0.000042           | 0.000028 | 0.004082 | 0.026580       | 0.417885        | Down       |
| N-Acetylneuraminic acid      | 0.000111            | 0.000031 | 0.000316           | 0.000093 | 0.003286 | 0.023089       | 2.859323        | Up         |
| Phenylacetic Acid            | 0.000039            | 0.000009 | 0.000111           | 0.000044 | 0.010114 | 0.044268       | 2.855621        | Up         |
| Sn-Glycero-3-Phosphocholine  | 0.001641            | 0.000243 | 0.000801           | 0.000165 | 0.000024 | 0.005384       | 0.487717        | Down       |
| Succinylcarnitine            | 0.000006            | 0.000004 | 0.000015           | 0.000002 | 0.003741 | 0.024974       | 2.515806        | Up         |
| Thyroxine                    | 0.000103            | 0.000025 | 0.000217           | 0.000087 | 0.008574 | 0.040147       | 2.104058        | Up         |

**Legend.** Std: Standard deviation; LPE: Lysophosphatidylethanolamine.
